# Supplementary material for: Determination of the geometry change of 5-cyanoindole upon electronic excitation from a combined Franck–Condon/rotational constants fit
Source: Royal Society of Chemistry journal article supplement (doi:10.1039/c3cp51795k), 2013-09-09
Supplement: c3cp51795k.pdf [file c3cp51795k.pdf]

# Online Supplementary material for: Determination of the Geometry Change of 5-Cyanoindole upon Electronic Excitation from a Combined Franck-Condon/Rotational Constants Fit.

Benjamin Stuhlmann, Anne Gräßle, and Michael Schmitt

April 26, 2013

The online supporting material contains:

- Figure S1 The fluorescence emission spectra through the vibronic bands at  $666\text{ cm}^{-1}$ ,  $876\text{ cm}^{-1}$ , and  $884\text{ cm}^{-1}$ .
- Table S1 SCS-CC2/cc-pVTZ calculated optimized  $S_0$  cartesian coordinates.
- Table S2 SCS-CC2/cc-pVTZ calculated optimized  $S_1$  cartesian coordinates.
- Table S3 Experimental intensities of the assigned bands in the DF and LIF spectra.
- Table S4 Complete Duschinsky matrix for the  $S_0$  and  $S_1$  modes of 5CI

Table S1: SCS-CC2/cc-pVTZ calculated optimized  $S_0$  cartesian coordinates of 5CI (in bohr).

|   |             |             |             |
|---|-------------|-------------|-------------|
| c | 2.35019781  | -3.46398276 | -0.06583061 |
| c | 1.28135652  | -0.97281537 | -0.00578832 |
| c | -1.38961411 | -1.25884087 | -0.06860637 |
| n | -1.89043978 | -3.80593228 | -0.16184733 |
| c | 0.36301331  | -5.13025296 | -0.16013315 |
| c | 2.31302511  | 1.46736094  | 0.09439528  |
| c | 0.67241128  | 3.52912870  | 0.12867474  |
| c | -1.98699674 | 3.20244899  | 0.06483292  |
| c | -3.04346320 | 0.80888173  | -0.03428126 |
| c | 1.68504998  | 6.04595455  | 0.23055902  |
| n | 2.50559442  | 8.11020028  | 0.31366763  |
| h | 4.32368942  | -3.96057592 | -0.04256695 |
| h | 0.36148410  | -7.16517968 | -0.22675658 |
| h | -3.61968003 | -4.58790024 | -0.22239344 |
| h | 4.33593391  | 1.76399170  | 0.14448228  |
| h | -5.07329575 | 0.56211543  | -0.08298895 |
| h | -3.18826627 | 4.85539776  | 0.09458110  |

Table S2: SCS-CC2/cc-pVTZ calculated optimized  $S_1$  cartesian coordinates of 5CI (in bohr).

|   |             |             |             |
|---|-------------|-------------|-------------|
| c | 2.34807092  | -3.45121350 | -0.06567041 |
| c | 1.31745932  | -0.98607006 | -0.00698208 |
| c | -1.42925839 | -1.27098536 | -0.07067684 |
| n | -1.90275426 | -3.83626947 | -0.16247871 |
| c | 0.34811237  | -5.16343948 | -0.16031102 |
| c | 2.41402094  | 1.45822464  | 0.09393837  |
| c | 0.70538740  | 3.58187038  | 0.12996315  |
| c | -2.00778801 | 3.23347115  | 0.06409216  |
| c | -3.10968351 | 0.78973714  | -0.03755976 |
| c | 1.67494416  | 6.07294292  | 0.23293712  |
| n | 2.48621201  | 8.15247905  | 0.31986988  |
| h | 4.32112387  | -3.95620480 | -0.04261124 |
| h | 0.36191796  | -7.19766887 | -0.22525079 |
| h | -3.62911603 | -4.62778158 | -0.22186540 |
| h | 4.43380807  | 1.74901566  | 0.14363946  |
| h | -5.13799148 | 0.55595816  | -0.08572679 |
| h | -3.19446532 | 4.89593403  | 0.09469290  |

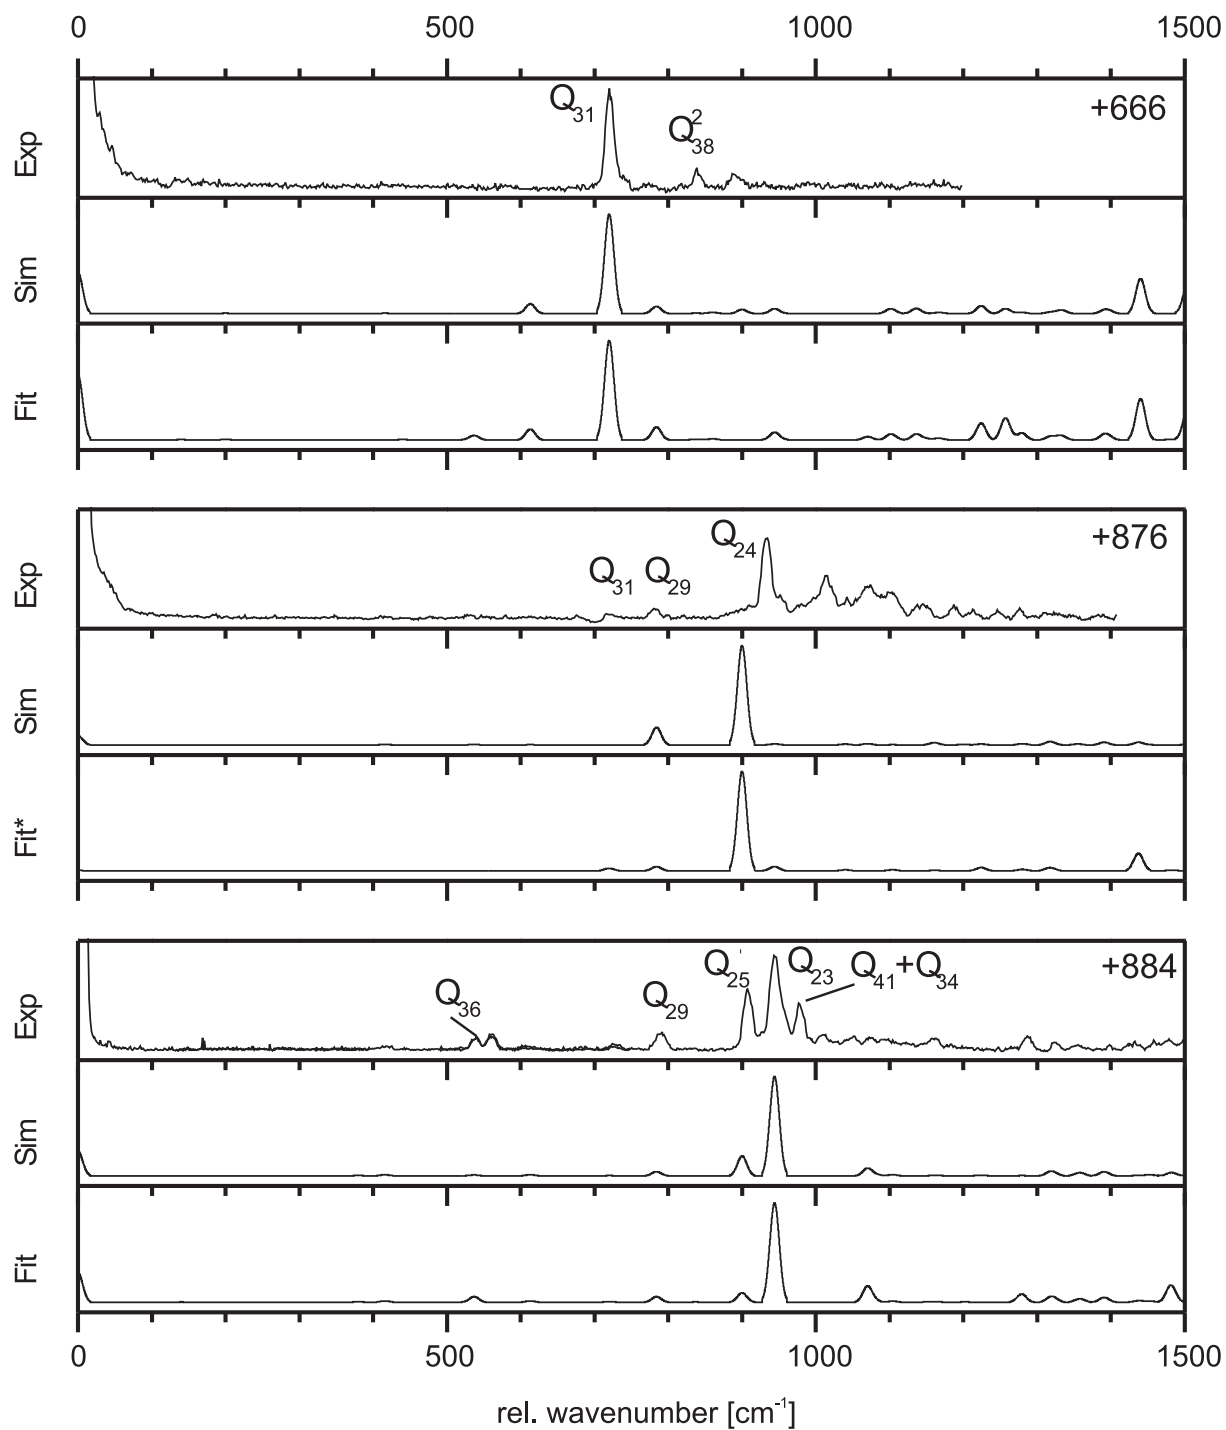

Figure S1: Dispersed fluorescence spectra of 5CI obtained via pumping the vibronic bands at  $666\text{ cm}^{-1}$ ,  $876\text{ cm}^{-1}$ , and  $884\text{ cm}^{-1}$ . Within each block, the first trace gives the experimental spectrum, the second trace a FC simulation using the *ab initio* values, and the third trace the FC fit. See text for details.

Table S4: Complete Duschinsky matrix for the  $S_0$  and  $S_1$  modes of 5CI, calculated from the CC2/cc-pVTZ structures and Hessians.

| Nr.      | $S_0/S_1$ | 77.2     | 134.7    | 172.1    | 224.3    | 308.7    | 334.4    |
|----------|-----------|----------|----------|----------|----------|----------|----------|
| $Q_{45}$ | 105.2     | -0.99266 | -0.00150 | -0.02392 | 0.00706  | 0.09688  | 0.01757  |
| $Q_{44}$ | 139.2     | 0.00148  | -0.99950 | 0.00087  | 0.00034  | -0.00001 | -0.00026 |
| $Q_{43}$ | 225.7     | -0.02643 | 0.00080  | 0.99049  | -0.09676 | 0.00395  | -0.07872 |
| $Q_{42}$ | 263.9     | 0.01518  | 0.00044  | 0.10437  | 0.98138  | 0.01701  | 0.03902  |
| $Q_{41}$ | 379.1     | -0.00030 | 0.01045  | -0.00057 | 0.00047  | 0.00169  | -0.02373 |
| $Q_{40}$ | 400.2     | 0.00066  | -0.00018 | -0.06837 | 0.01797  | 0.06434  | -0.97164 |
| $Q_{39}$ | 417.1     | 0.00154  | 0.00263  | -0.00022 | -0.00039 | 0.00532  | 0.01346  |
| $Q_{38}$ | 421.3     | -0.08688 | -0.00007 | 0.00434  | -0.00462 | -0.97853 | -0.03145 |
| $Q_{37}$ | 481.7     | -0.07074 | -0.00006 | -0.02420 | 0.15862  | -0.13447 | -0.15762 |
| $Q_{36}$ | 532.2     | -0.00005 | 0.02166  | -0.00037 | 0.00020  | 0.00083  | -0.0034  |
| $Q_{35}$ | 606.1     | 0.00490  | 0.00008  | 0.03538  | -0.03401 | 0.04596  | 0.10667  |
| $Q_{34}$ | 613.8     | -0.00009 | 0.00841  | -0.00047 | 0.00049  | 0.00042  | -0.0028  |
| $Q_{33}$ | 633.2     | -0.01883 | -0.00001 | -0.00179 | -0.00982 | -0.05274 | -0.0894  |
| $Q_{32}$ | 722.0     | -0.02359 | -0.00002 | 0.01999  | -0.01597 | -0.01152 | 0.0268   |
| $Q_{31}$ | 729.2     | -0.00018 | -0.00614 | 0.00015  | 0.00046  | -0.00015 | 0.0026   |
| $Q_{30}$ | 758.4     | -0.00592 | -0.00003 | 0.00458  | -0.01007 | 0.03019  | 0.0152   |
| $Q_{29}$ | 788.2     | -0.00030 | 0.00104  | 0.00019  | -0.00031 | 0.00021  | -0.00101 |
| $Q_{28}$ | 812.4     | -0.00041 | 0.00001  | 0.01241  | 0.00374  | 0.06255  | -0.02543 |
| $Q_{27}$ | 853.3     | 0.00371  | 0.00000  | -0.00917 | 0.00909  | -0.00159 | -0.01360 |
| $Q_{26}$ | 896.8     | -0.00323 | -0.00000 | 0.01519  | 0.01464  | -0.02465 | -0.01002 |
| $Q_{25}$ | 900.7     | -0.00018 | 0.00325  | -0.00031 | -0.00002 | 0.00006  | -0.00102 |
| $Q_{24}$ | 934.2     | -0.00473 | -0.00001 | -0.00067 | -0.00034 | -0.00712 | -0.00276 |
| $Q_{23}$ | 946.4     | 0.00021  | 0.00018  | 0.00002  | -0.00006 | 0.00010  | -0.00038 |
| $Q_{22}$ | 1087.9    | 0.00018  | 0.00185  | 0.00007  | 0.00020  | 0.00005  | -0.00084 |
| $Q_{21}$ | 1110.3    | 0.00001  | 0.00386  | 0.00002  | -0.00002 | 0.00002  | -0.00131 |
| $Q_{20}$ | 1148.0    | -0.00022 | 0.00317  | -0.00020 | 0.00016  | 0.00033  | -0.00073 |
| $Q_{19}$ | 1159.6    | -0.00004 | -0.00070 | 0.00008  | 0.00012  | -0.00018 | 0.00085  |
| $Q_{18}$ | 1238.7    | 0.00011  | 0.01057  | -0.00005 | -0.00023 | 0.00026  | -0.00204 |
| $Q_{17}$ | 1269.9    | 0.00008  | -0.00223 | 0.00014  | 0.00005  | -0.00010 | 0.00043  |
| $Q_{16}$ | 1303.8    | -0.00020 | 0.00115  | 0.00008  | -0.00018 | 0.00047  | -0.00024 |
| $Q_{15}$ | 1353.2    | 0.00014  | -0.00548 | -0.00002 | 0.00013  | -0.00021 | 0.00056  |
| $Q_{14}$ | 1390.2    | 0.00000  | 0.00391  | 0.00004  | 0.00017  | -0.00020 | -0.00034 |
| $Q_{13}$ | 1457.3    | -0.00004 | 0.00421  | -0.00020 | -0.00005 | 0.00027  | -0.00090 |
| $Q_{12}$ | 1487.0    | -0.00006 | -0.00562 | 0.00009  | -0.00001 | 0.00017  | 0.00004  |
| $Q_{11}$ | 1499.8    | -0.00014 | -0.00152 | 0.00004  | 0.00010  | -0.00010 | -0.00004 |
| $Q_{10}$ | 1546.3    | 0.00006  | -0.00623 | -0.00003 | 0.00022  | -0.00043 | 0.00172  |
| $Q_9$    | 1611.8    | -0.00004 | 0.00044  | -0.00002 | 0.00010  | -0.00010 | 0.00017  |
| $Q_8$    | 1657.9    | -0.00003 | -0.00229 | -0.00001 | 0.00012  | -0.00002 | 0.00033  |
| $Q_7$    | 2151.4    | 0.00028  | 0.00149  | 0.00006  | -0.00042 | -0.00036 | 0.00005  |
| $Q_6$    | 3205.8    | -0.00001 | -0.00017 | 0.00001  | 0.00001  | 0.00000  | 0.00006  |
| $Q_5$    | 3214.3    | -0.00000 | 0.00032  | -0.00000 | 0.00001  | 0.00001  | 0.00005  |
| $Q_4$    | 3226.8    | 0.00000  | 0.00004  | -0.00003 | -0.00001 | -0.00001 | -0.00000 |
| $Q_3$    | 3267.6    | -0.00003 | 0.00039  | 0.00005  | -0.00004 | 0.00002  | 0.00003  |
| $Q_2$    | 3286.4    | 0.00003  | -0.00010 | -0.00003 | 0.00004  | -0.00003 | 0.00006  |

*Continued on next page*

|          |           |          |          |          |          |          |          |
|----------|-----------|----------|----------|----------|----------|----------|----------|
| $Q_1$    | 3680.4    | -0.00005 | 0.00007  | 0.00010  | -0.00000 | -0.00004 | -0.00075 |
| Nr.      | $S_0/S_1$ | 341.0    | 374.2    | 394.9    | 474.3    | 508.0    | 551.4    |
| $Q_{45}$ | 105.2     | -0.00026 | -0.06128 | 0.00081  | -0.00007 | 0.01113  | -0.01020 |
| $Q_{44}$ | 139.2     | 0.01398  | 0.00010  | 0.00551  | -0.02472 | -0.00000 | 0.00000  |
| $Q_{43}$ | 225.7     | -0.00172 | 0.02642  | 0.00044  | -0.00038 | 0.00370  | -0.03497 |
| $Q_{42}$ | 263.9     | 0.00083  | -0.13653 | 0.00038  | -0.00008 | 0.05311  | 0.04246  |
| $Q_{41}$ | 379.1     | 0.86942  | 0.00264  | 0.46274  | 0.14228  | 0.00057  | -0.00028 |
| $Q_{40}$ | 400.2     | -0.02677 | -0.18969 | 0.00146  | -0.00005 | -0.05872 | 0.04510  |
| $Q_{39}$ | 417.1     | -0.43611 | 0.00177  | 0.88117  | -0.10823 | -0.00049 | 0.00002  |
| $Q_{38}$ | 421.3     | -0.00129 | -0.16321 | 0.00594  | -0.00152 | -0.01027 | 0.02081  |
| $Q_{37}$ | 481.7     | -0.00593 | 0.87417  | -0.00146 | 0.00089  | -0.38955 | -0.05844 |
| $Q_{36}$ | 532.2     | 0.11645  | 0.00110  | -0.00468 | -0.88806 | -0.00042 | -0.00047 |
| $Q_{35}$ | 606.1     | 0.00453  | -0.19979 | -0.00008 | -0.00171 | -0.61296 | 0.73633  |
| $Q_{34}$ | 613.8     | 0.09311  | 0.00116  | -0.02934 | -0.35951 | 0.00227  | -0.00348 |
| $Q_{33}$ | 633.2     | -0.00303 | 0.28664  | -0.00044 | -0.00065 | 0.66018  | 0.60591  |
| $Q_{32}$ | 722.0     | 0.00002  | 0.14201  | 0.00019  | 0.00043  | 0.11123  | 0.22240  |
| $Q_{31}$ | 729.2     | -0.11977 | -0.00075 | 0.06491  | 0.10972  | -0.00054 | 0.00015  |
| $Q_{30}$ | 758.4     | -0.00009 | 0.05668  | 0.00006  | 0.00050  | 0.02384  | 0.13443  |
| $Q_{29}$ | 788.2     | 0.00532  | -0.00004 | 0.00847  | -0.08215 | -0.00027 | 0.00120  |
| $Q_{28}$ | 812.4     | -0.00112 | 0.03511  | -0.00003 | 0.00055  | 0.01080  | 0.09656  |
| $Q_{27}$ | 853.3     | -0.00040 | 0.00546  | -0.00010 | 0.00004  | 0.02277  | -0.06657 |
| $Q_{26}$ | 896.8     | 0.00018  | -0.02528 | -0.00020 | 0.00043  | -0.11112 | -0.01906 |
| $Q_{25}$ | 900.7     | 0.01594  | -0.00012 | -0.01639 | -0.02502 | -0.00076 | 0.00107  |
| $Q_{24}$ | 934.2     | -0.00027 | 0.05214  | 0.00005  | 0.00005  | 0.06510  | -0.00258 |
| $Q_{23}$ | 946.4     | 0.00135  | 0.00026  | 0.01394  | 0.00009  | 0.00004  | 0.00013  |
| $Q_{22}$ | 1087.9    | 0.03865  | 0.00023  | -0.01131 | -0.03067 | 0.00003  | 0.00015  |
| $Q_{21}$ | 1110.3    | 0.03716  | -0.00007 | -0.02299 | -0.04736 | -0.00010 | 0.00003  |
| $Q_{20}$ | 1148.0    | 0.02837  | -0.00007 | -0.00791 | -0.05236 | -0.00011 | -0.00009 |
| $Q_{19}$ | 1159.6    | -0.02971 | -0.00022 | 0.00548  | 0.00536  | 0.00000  | -0.00007 |
| $Q_{18}$ | 1238.7    | 0.07339  | 0.00019  | -0.03544 | -0.08862 | -0.00012 | 0.00012  |
| $Q_{17}$ | 1269.9    | -0.01936 | -0.00007 | 0.00554  | 0.02931  | -0.00017 | 0.00025  |
| $Q_{16}$ | 1303.8    | 0.00365  | -0.00007 | 0.00243  | -0.02524 | -0.00011 | 0.00032  |
| $Q_{15}$ | 1353.2    | -0.03307 | 0.00003  | 0.00164  | 0.05856  | 0.00008  | 0.00032  |
| $Q_{14}$ | 1390.2    | 0.02161  | -0.00016 | 0.00225  | -0.06290 | -0.00023 | 0.00003  |
| $Q_{13}$ | 1457.3    | 0.03797  | 0.00023  | -0.01550 | -0.04145 | 0.00002  | 0.00025  |
| $Q_{12}$ | 1487.0    | -0.00622 | 0.00005  | 0.01499  | 0.04772  | -0.00001 | 0.00020  |
| $Q_{11}$ | 1499.8    | -0.01421 | -0.00031 | 0.01592  | 0.00327  | -0.00009 | -0.00021 |
| $Q_{10}$ | 1546.3    | -0.04837 | -0.00002 | 0.02948  | 0.05419  | 0.00009  | 0.00011  |
| $Q_9$    | 1611.8    | -0.00820 | 0.00001  | 0.00451  | -0.00799 | 0.00011  | -0.00020 |
| $Q_8$    | 1657.9    | -0.00308 | -0.00000 | 0.00014  | 0.01647  | -0.00005 | 0.00001  |
| $Q_7$    | 2151.4    | -0.00889 | 0.00068  | 0.00726  | 0.01151  | -0.00077 | -0.00015 |
| $Q_6$    | 3205.8    | -0.00050 | 0.00002  | -0.00051 | 0.00144  | 0.00000  | -0.00003 |
| $Q_5$    | 3214.3    | 0.00000  | 0.00003  | -0.00014 | -0.00147 | -0.00003 | -0.00005 |
| $Q_4$    | 3226.8    | -0.00129 | 0.00001  | 0.00143  | 0.00230  | 0.00004  | 0.00002  |
| $Q_3$    | 3267.6    | 0.00023  | 0.00002  | -0.00068 | -0.00094 | 0.00009  | -0.00020 |
| $Q_2$    | 3286.4    | -0.00071 | 0.00003  | 0.00033  | 0.00075  | -0.00003 | 0.00012  |
| $Q_1$    | 3680.4    | -0.00087 | -0.00027 | -0.00010 | 0.00062  | -0.00012 | 0.00026  |

*Continued on next page*

| Nr.             | S <sub>0</sub> /S <sub>1</sub> | 582.2    | 599.5    | 615.9    | 639.1    | 661.6    | 689.1    |
|-----------------|--------------------------------|----------|----------|----------|----------|----------|----------|
| Q <sub>45</sub> | 105.2                          | -0.00006 | -0.00759 | 0.01009  | -0.00646 | 0.00033  | -0.00281 |
| Q <sub>44</sub> | 139.2                          | -0.00102 | -0.00001 | -0.00002 | -0.00001 | 0.00492  | 0.00002  |
| Q <sub>43</sub> | 225.7                          | -0.00024 | 0.00173  | 0.02305  | -0.00691 | 0.00008  | -0.00651 |
| Q <sub>42</sub> | 263.9                          | 0.00012  | 0.02219  | -0.00289 | 0.01097  | 0.00062  | 0.00306  |
| Q <sub>41</sub> | 379.1                          | 0.04451  | 0.00025  | 0.00001  | -0.00010 | -0.06782 | -0.00011 |
| Q <sub>40</sub> | 400.2                          | -0.00028 | 0.04838  | -0.00871 | 0.04488  | 0.00078  | 0.01010  |
| Q <sub>39</sub> | 417.1                          | -0.07045 | -0.00095 | 0.00023  | 0.00016  | 0.10861  | 0.00012  |
| Q <sub>38</sub> | 421.3                          | -0.00045 | 0.04394  | -0.04221 | -0.04484 | 0.00067  | -0.02183 |
| Q <sub>37</sub> | 481.7                          | -0.00030 | -0.01863 | 0.06511  | -0.04285 | 0.00007  | 0.00210  |
| Q <sub>36</sub> | 532.2                          | 0.41610  | -0.00044 | 0.00009  | 0.00004  | -0.07598 | -0.00020 |
| Q <sub>35</sub> | 606.1                          | -0.00393 | -0.02858 | 0.11579  | -0.03160 | -0.00072 | -0.00086 |
| Q <sub>34</sub> | 613.8                          | -0.88058 | 0.00186  | -0.00258 | 0.00026  | -0.24831 | -0.00049 |
| Q <sub>33</sub> | 633.2                          | -0.00102 | -0.24578 | 0.17728  | -0.07919 | -0.00018 | -0.02587 |
| Q <sub>32</sub> | 722.0                          | 0.00183  | 0.42177  | -0.54770 | 0.50165  | -0.00085 | 0.36695  |
| Q <sub>31</sub> | 729.2                          | 0.16002  | -0.00047 | 0.00128  | -0.00029 | -0.92820 | -0.00058 |
| Q <sub>30</sub> | 758.4                          | 0.00113  | 0.38109  | -0.13103 | 0.20510  | 0.00049  | -0.76047 |
| Q <sub>29</sub> | 788.2                          | -0.02024 | 0.00098  | 0.00033  | -0.00003 | -0.04349 | -0.00019 |
| Q <sub>28</sub> | 812.4                          | 0.00134  | 0.00031  | -0.65745 | -0.70640 | -0.00060 | 0.00054  |
| Q <sub>27</sub> | 853.3                          | 0.00018  | -0.07361 | -0.12981 | -0.06090 | 0.00049  | -0.51314 |
| Q <sub>26</sub> | 896.8                          | -0.00036 | -0.77766 | -0.41613 | 0.40237  | -0.00042 | -0.11544 |
| Q <sub>25</sub> | 900.7                          | -0.01414 | -0.00379 | -0.00166 | 0.00226  | 0.03325  | -0.00034 |
| Q <sub>24</sub> | 934.2                          | -0.00007 | -0.01630 | 0.09498  | 0.16826  | -0.00111 | -0.09529 |
| Q <sub>23</sub> | 946.4                          | 0.03025  | -0.00104 | 0.00028  | 0.00099  | -0.01962 | -0.00045 |
| Q <sub>22</sub> | 1087.9                         | -0.04270 | 0.00013  | 0.00019  | -0.00027 | 0.06536  | 0.00010  |
| Q <sub>21</sub> | 1110.3                         | -0.04155 | -0.00038 | -0.00005 | 0.00026  | 0.04893  | 0.00001  |
| Q <sub>20</sub> | 1148.0                         | -0.02765 | 0.00000  | -0.00009 | -0.00012 | 0.10306  | 0.00027  |
| Q <sub>19</sub> | 1159.6                         | 0.03466  | -0.00020 | -0.00001 | 0.00009  | -0.02568 | -0.00008 |
| Q <sub>18</sub> | 1238.7                         | -0.06617 | -0.00001 | -0.00021 | -0.00003 | 0.10776  | 0.00027  |
| Q <sub>17</sub> | 1269.9                         | 0.02302  | -0.00006 | -0.00008 | 0.00029  | -0.04693 | 0.00012  |
| Q <sub>16</sub> | 1303.8                         | -0.01505 | -0.00014 | -0.00006 | 0.00002  | 0.04457  | 0.00000  |
| Q <sub>15</sub> | 1353.2                         | 0.03322  | -0.00025 | 0.00005  | 0.00016  | -0.07233 | 0.00016  |
| Q <sub>14</sub> | 1390.2                         | -0.02164 | -0.00001 | -0.00029 | 0.00007  | 0.03444  | 0.00007  |
| Q <sub>13</sub> | 1457.3                         | -0.04139 | -0.00010 | 0.00004  | -0.00011 | 0.06887  | 0.00019  |
| Q <sub>12</sub> | 1487.0                         | -0.00951 | 0.00017  | 0.00018  | -0.00029 | -0.01276 | 0.00017  |
| Q <sub>11</sub> | 1499.8                         | 0.01827  | -0.00003 | 0.00020  | -0.00014 | -0.00519 | 0.00010  |
| Q <sub>10</sub> | 1546.3                         | 0.05329  | 0.00011  | 0.00027  | -0.00020 | -0.07603 | -0.00017 |
| Q <sub>9</sub>  | 1611.8                         | 0.00967  | 0.00024  | -0.00017 | 0.00011  | -0.01001 | -0.00006 |
| Q <sub>8</sub>  | 1657.9                         | 0.00376  | 0.00018  | -0.00026 | 0.00001  | -0.00908 | -0.00009 |
| Q <sub>7</sub>  | 2151.4                         | 0.00345  | 0.00013  | 0.00002  | -0.00012 | -0.01111 | 0.00002  |
| Q <sub>6</sub>  | 3205.8                         | -0.00011 | 0.00003  | 0.00011  | 0.00011  | 0.00006  | -0.00003 |
| Q <sub>5</sub>  | 3214.3                         | 0.00032  | -0.00017 | -0.00010 | 0.00007  | -0.00178 | -0.00003 |
| Q <sub>4</sub>  | 3226.8                         | 0.00162  | -0.00008 | -0.00012 | -0.00010 | -0.00318 | -0.00001 |
| Q <sub>3</sub>  | 3267.6                         | -0.00072 | 0.00004  | 0.00006  | -0.00008 | 0.00030  | -0.00059 |
| Q <sub>2</sub>  | 3286.4                         | 0.00027  | 0.00001  | -0.00002 | 0.00004  | -0.00046 | 0.00049  |
| Q <sub>1</sub>  | 3680.4                         | 0.00011  | 0.00008  | 0.00003  | 0.00001  | -0.00089 | -0.00007 |

*Continued on next page*

| Nr.             | S <sub>0</sub> /S <sub>1</sub> | 730.8    | 756.8    | 818.7    | 866.9    | 875.3    | 961.8    |
|-----------------|--------------------------------|----------|----------|----------|----------|----------|----------|
| Q <sub>45</sub> | 105.2                          | -0.00188 | 0.00031  | 0.00243  | 0.00011  | 0.00012  | 0.00009  |
| Q <sub>44</sub> | 139.2                          | 0.00001  | -0.00046 | 0.00001  | -0.00490 | -0.00187 | 0.00672  |
| Q <sub>43</sub> | 225.7                          | -0.00319 | 0.00019  | 0.00675  | -0.00039 | 0.00011  | -0.00008 |
| Q <sub>42</sub> | 263.9                          | 0.00368  | -0.00028 | -0.00172 | -0.00003 | 0.00003  | 0.00003  |
| Q <sub>41</sub> | 379.1                          | -0.00012 | 0.00225  | -0.00002 | 0.00934  | 0.00692  | -0.04315 |
| Q <sub>40</sub> | 400.2                          | 0.00674  | 0.00110  | 0.00249  | 0.00036  | -0.00038 | 0.00000  |
| Q <sub>39</sub> | 417.1                          | -0.00009 | 0.00332  | 0.00014  | -0.03055 | -0.02328 | 0.03808  |
| Q <sub>38</sub> | 421.3                          | 0.01253  | 0.00003  | -0.01756 | -0.00027 | -0.00005 | 0.00054  |
| Q <sub>37</sub> | 481.7                          | -0.02175 | -0.00011 | 0.00130  | -0.00002 | -0.00010 | 0.00003  |
| Q <sub>36</sub> | 532.2                          | -0.00050 | 0.07922  | -0.00015 | 0.02365  | 0.00845  | -0.07501 |
| Q <sub>35</sub> | 606.1                          | 0.04667  | 0.00170  | 0.09385  | 0.00103  | 0.00015  | -0.00065 |
| Q <sub>34</sub> | 613.8                          | -0.00060 | 0.07116  | -0.00053 | 0.04060  | 0.06488  | -0.10332 |
| Q <sub>33</sub> | 633.2                          | -0.06906 | 0.00031  | 0.00777  | 0.00034  | -0.00019 | -0.00004 |
| Q <sub>32</sub> | 722.0                          | -0.00796 | 0.00014  | 0.22737  | -0.00003 | 0.00017  | 0.00047  |
| Q <sub>31</sub> | 729.2                          | -0.00115 | -0.00877 | 0.00031  | -0.11821 | -0.09212 | 0.23107  |
| Q <sub>30</sub> | 758.4                          | -0.08897 | 0.00029  | -0.43144 | -0.00039 | -0.00033 | 0.00051  |
| Q <sub>29</sub> | 788.2                          | 0.00421  | -0.96601 | -0.00055 | 0.22391  | -0.03395 | -0.04762 |
| Q <sub>28</sub> | 812.4                          | 0.18636  | 0.00078  | -0.13645 | 0.00002  | 0.00007  | 0.00022  |
| Q <sub>27</sub> | 853.3                          | -0.04174 | -0.00088 | 0.83882  | -0.00033 | 0.00065  | -0.00016 |
| Q <sub>26</sub> | 896.8                          | -0.04242 | 0.00005  | -0.17467 | 0.00442  | -0.00221 | 0.00056  |
| Q <sub>25</sub> | 900.7                          | 0.00265  | -0.20919 | -0.00127 | -0.91938 | 0.24734  | -0.19174 |
| Q <sub>24</sub> | 934.2                          | 0.97266  | 0.00466  | 0.01325  | 0.00119  | -0.00328 | -0.00056 |
| Q <sub>23</sub> | 946.4                          | 0.00285  | -0.00067 | -0.00069 | 0.17234  | 0.89459  | 0.36155  |
| Q <sub>22</sub> | 1087.9                         | 0.00003  | -0.01671 | -0.00006 | -0.06978 | -0.16791 | 0.41568  |
| Q <sub>21</sub> | 1110.3                         | 0.00030  | -0.00934 | 0.00014  | -0.08927 | -0.13967 | 0.26997  |
| Q <sub>20</sub> | 1148.0                         | 0.00051  | -0.07131 | 0.00031  | -0.07363 | 0.03033  | 0.37078  |
| Q <sub>19</sub> | 1159.6                         | 0.00016  | -0.00569 | -0.00008 | 0.01601  | 0.09083  | -0.19212 |
| Q <sub>18</sub> | 1238.7                         | 0.00013  | -0.04775 | 0.00044  | -0.15163 | -0.16489 | 0.41320  |
| Q <sub>17</sub> | 1269.9                         | -0.00003 | 0.02908  | 0.00011  | 0.04789  | 0.05181  | -0.15400 |
| Q <sub>16</sub> | 1303.8                         | 0.00017  | -0.01054 | 0.00005  | -0.00407 | -0.02476 | 0.09337  |
| Q <sub>15</sub> | 1353.2                         | -0.00012 | 0.01453  | 0.00018  | 0.05846  | 0.05280  | -0.20979 |
| Q <sub>14</sub> | 1390.2                         | 0.00043  | 0.02342  | 0.00018  | -0.05615 | -0.03456 | 0.10159  |
| Q <sub>13</sub> | 1457.3                         | 0.00001  | -0.03932 | 0.00014  | -0.04637 | -0.07581 | 0.20059  |
| Q <sub>12</sub> | 1487.0                         | -0.00045 | 0.01587  | 0.00013  | 0.03483  | -0.04564 | -0.00270 |
| Q <sub>11</sub> | 1499.8                         | 0.00005  | -0.01205 | -0.00022 | 0.00884  | 0.09930  | -0.02438 |
| Q <sub>10</sub> | 1546.3                         | -0.00021 | 0.01118  | 0.00024  | 0.05579  | 0.11504  | -0.19379 |
| Q <sub>9</sub>  | 1611.8                         | -0.00010 | 0.00406  | -0.00018 | 0.01260  | 0.02278  | -0.02509 |
| Q <sub>8</sub>  | 1657.9                         | -0.00012 | 0.00329  | -0.00005 | 0.02255  | 0.03192  | -0.01397 |
| Q <sub>7</sub>  | 2151.4                         | 0.00015  | -0.00308 | 0.00001  | 0.00584  | 0.01379  | -0.01954 |
| Q <sub>6</sub>  | 3205.8                         | 0.00012  | 0.00138  | 0.00000  | -0.00013 | -0.00203 | -0.00024 |
| Q <sub>5</sub>  | 3214.3                         | -0.00003 | 0.00026  | 0.00001  | -0.00012 | -0.00031 | -0.00109 |
| Q <sub>4</sub>  | 3226.8                         | 0.00007  | 0.00039  | -0.00000 | 0.00085  | -0.00011 | -0.00276 |
| Q <sub>3</sub>  | 3267.6                         | -0.00008 | -0.00051 | 0.00011  | -0.00092 | -0.00011 | 0.00303  |
| Q <sub>2</sub>  | 3286.4                         | 0.00008  | 0.00030  | -0.00027 | 0.00001  | 0.00103  | -0.00186 |
| Q <sub>1</sub>  | 3680.4                         | -0.00003 | 0.00093  | -0.00006 | 0.00210  | 0.00029  | -0.00180 |

*Continued on next page*

| Nr.             | S <sub>0</sub> /S <sub>1</sub> | 1062.8   | 1087.1   | 1107.3   | 1170.5   | 1239.0   | 1272.6   |
|-----------------|--------------------------------|----------|----------|----------|----------|----------|----------|
| Q <sub>45</sub> | 105.2                          | -0.00023 | 0.00025  | 0.00008  | 0.00019  | 0.00016  | 0.00024  |
| Q <sub>44</sub> | 139.2                          | 0.00365  | -0.00050 | -0.00070 | 0.00436  | 0.00167  | 0.00013  |
| Q <sub>43</sub> | 225.7                          | 0.00002  | -0.00016 | -0.00000 | -0.00013 | -0.00006 | 0.00013  |
| Q <sub>42</sub> | 263.9                          | 0.00019  | -0.00003 | 0.00021  | 0.00034  | 0.00003  | -0.00010 |
| Q <sub>41</sub> | 379.1                          | 0.00600  | 0.00147  | -0.01327 | -0.01041 | -0.00303 | -0.00562 |
| Q <sub>40</sub> | 400.2                          | -0.00032 | -0.00018 | -0.00018 | 0.00004  | -0.00007 | 0.00018  |
| Q <sub>39</sub> | 417.1                          | 0.00881  | 0.01189  | 0.00898  | 0.01756  | 0.01243  | 0.01319  |
| Q <sub>38</sub> | 421.3                          | 0.00015  | -0.00015 | 0.00005  | 0.00016  | 0.00008  | -0.00021 |
| Q <sub>37</sub> | 481.7                          | 0.00022  | -0.00006 | -0.00010 | -0.00002 | -0.00006 | -0.00013 |
| Q <sub>36</sub> | 532.2                          | -0.03509 | 0.00385  | 0.01572  | -0.02071 | -0.00556 | 0.00983  |
| Q <sub>35</sub> | 606.1                          | 0.00000  | -0.00013 | -0.00007 | -0.00017 | -0.00037 | 0.00025  |
| Q <sub>34</sub> | 613.8                          | -0.01679 | -0.00501 | -0.01581 | -0.02814 | -0.00671 | 0.00219  |
| Q <sub>33</sub> | 633.2                          | 0.00022  | -0.00022 | -0.00007 | -0.00013 | -0.00002 | 0.00003  |
| Q <sub>32</sub> | 722.0                          | -0.00001 | 0.00008  | -0.00006 | 0.00000  | -0.00042 | -0.00009 |
| Q <sub>31</sub> | 729.2                          | 0.04749  | -0.03981 | -0.02097 | 0.01597  | -0.00416 | -0.02072 |
| Q <sub>30</sub> | 758.4                          | 0.00023  | -0.00009 | -0.00010 | -0.00012 | 0.00021  | 0.00017  |
| Q <sub>29</sub> | 788.2                          | -0.02173 | 0.02997  | 0.02652  | 0.01193  | 0.01001  | -0.00134 |
| Q <sub>28</sub> | 812.4                          | 0.00011  | 0.00020  | 0.00006  | 0.00001  | 0.00008  | 0.00004  |
| Q <sub>27</sub> | 853.3                          | -0.00025 | 0.00013  | 0.00005  | 0.00005  | -0.00014 | -0.00012 |
| Q <sub>26</sub> | 896.8                          | -0.00014 | -0.00057 | -0.00020 | -0.00008 | -0.00018 | 0.00024  |
| Q <sub>25</sub> | 900.7                          | -0.06764 | 0.01992  | 0.03363  | -0.01525 | -0.00512 | -0.02374 |
| Q <sub>24</sub> | 934.2                          | -0.00001 | -0.00060 | -0.00017 | -0.00011 | -0.00011 | 0.00018  |
| Q <sub>23</sub> | 946.4                          | -0.02730 | 0.10573  | 0.06274  | 0.11101  | 0.00881  | 0.01263  |
| Q <sub>22</sub> | 1087.9                         | -0.75958 | 0.29464  | -0.29531 | -0.11415 | -0.06585 | -0.05048 |
| Q <sub>21</sub> | 1110.3                         | 0.42355  | 0.73694  | 0.27126  | -0.27686 | -0.02630 | -0.00538 |
| Q <sub>20</sub> | 1148.0                         | 0.23433  | -0.45878 | -0.25699 | -0.68371 | 0.06375  | 0.11594  |
| Q <sub>19</sub> | 1159.6                         | 0.27037  | 0.28646  | -0.84615 | 0.11246  | -0.08518 | 0.15253  |
| Q <sub>18</sub> | 1238.7                         | 0.16177  | -0.12919 | -0.05494 | 0.57263  | 0.34631  | 0.27575  |
| Q <sub>17</sub> | 1269.9                         | -0.08571 | 0.12515  | -0.04797 | -0.17412 | 0.91278  | -0.15260 |
| Q <sub>16</sub> | 1303.8                         | 0.11883  | -0.06150 | -0.14821 | 0.11460  | -0.03046 | -0.86170 |
| Q <sub>15</sub> | 1353.2                         | -0.08261 | 0.13814  | -0.01968 | -0.09300 | 0.09134  | 0.22733  |
| Q <sub>14</sub> | 1390.2                         | -0.06802 | -0.03467 | 0.04433  | 0.01586  | 0.03435  | 0.03822  |
| Q <sub>13</sub> | 1457.3                         | 0.07430  | -0.04178 | -0.03188 | 0.10489  | 0.01977  | 0.00992  |
| Q <sub>12</sub> | 1487.0                         | -0.11771 | -0.03050 | 0.12360  | -0.03791 | -0.06740 | 0.22258  |
| Q <sub>11</sub> | 1499.8                         | 0.02456  | -0.05418 | 0.01745  | -0.04026 | -0.11963 | -0.09744 |
| Q <sub>10</sub> | 1546.3                         | -0.15078 | 0.01754  | 0.00056  | -0.14558 | 0.00572  | 0.05720  |
| Q <sub>9</sub>  | 1611.8                         | -0.01993 | -0.02890 | 0.02678  | -0.00277 | -0.00667 | 0.03857  |
| Q <sub>8</sub>  | 1657.9                         | -0.06067 | 0.01113  | 0.05698  | 0.00829  | 0.01584  | 0.01844  |
| Q <sub>7</sub>  | 2151.4                         | -0.00559 | -0.00090 | -0.00067 | 0.00124  | -0.00498 | 0.00222  |
| Q <sub>6</sub>  | 3205.8                         | -0.00136 | -0.00081 | 0.00248  | -0.00059 | 0.00232  | -0.00382 |
| Q <sub>5</sub>  | 3214.3                         | 0.00100  | 0.00206  | -0.00120 | 0.00306  | 0.00073  | -0.00045 |
| Q <sub>4</sub>  | 3226.8                         | -0.00496 | -0.00200 | 0.00421  | -0.00267 | -0.00365 | 0.00281  |
| Q <sub>3</sub>  | 3267.6                         | -0.00001 | 0.00184  | 0.00107  | -0.00066 | -0.00258 | -0.00040 |
| Q <sub>2</sub>  | 3286.4                         | -0.00104 | -0.00099 | -0.00154 | 0.00112  | -0.00189 | -0.00090 |
| Q <sub>1</sub>  | 3680.4                         | -0.00107 | -0.00016 | 0.00078  | 0.00061  | -0.00179 | 0.00050  |

*Continued on next page*



| Nr.             | S <sub>0</sub> /S <sub>1</sub> | 1304.8   | 1354.0   | 1385.2   | 1430.5   | 1444.0   | 1526.0   |
|-----------------|--------------------------------|----------|----------|----------|----------|----------|----------|
| Q <sub>45</sub> | 105.2                          | -0.00011 | 0.00004  | 0.00013  | 0.00010  | 0.00002  | -0.00008 |
| Q <sub>44</sub> | 139.2                          | 0.00018  | 0.00231  | 0.00285  | 0.00083  | 0.00015  | 0.00030  |
| Q <sub>43</sub> | 225.7                          | -0.00008 | 0.00010  | 0.00010  | 0.00003  | -0.00016 | -0.00007 |
| Q <sub>42</sub> | 263.9                          | 0.00005  | -0.00005 | 0.00009  | 0.00010  | 0.00015  | -0.00002 |
| Q <sub>41</sub> | 379.1                          | -0.00712 | -0.00263 | 0.00408  | 0.00312  | -0.00273 | 0.00240  |
| Q <sub>40</sub> | 400.2                          | 0.00010  | 0.00030  | -0.00003 | 0.00042  | -0.00036 | -0.00036 |
| Q <sub>39</sub> | 417.1                          | -0.00406 | 0.00747  | 0.01738  | 0.00374  | 0.01419  | -0.00255 |
| Q <sub>38</sub> | 421.3                          | 0.00002  | -0.00001 | 0.00007  | 0.00006  | 0.00030  | 0.00000  |
| Q <sub>37</sub> | 481.7                          | 0.00006  | 0.00004  | -0.00007 | -0.00005 | 0.00002  | 0.00001  |
| Q <sub>36</sub> | 532.2                          | 0.00360  | -0.03050 | -0.00920 | 0.00218  | 0.00989  | -0.00468 |
| Q <sub>35</sub> | 606.1                          | 0.00014  | -0.00018 | 0.00037  | 0.00019  | -0.00008 | 0.00027  |
| Q <sub>34</sub> | 613.8                          | -0.00384 | -0.02730 | 0.00321  | 0.00522  | -0.01060 | -0.00129 |
| Q <sub>33</sub> | 633.2                          | 0.00022  | -0.00001 | -0.00000 | -0.00000 | 0.00003  | 0.00012  |
| Q <sub>32</sub> | 722.0                          | 0.00025  | -0.00015 | 0.00013  | -0.00012 | -0.00004 | -0.00009 |
| Q <sub>31</sub> | 729.2                          | 0.01343  | 0.02703  | 0.00287  | -0.01413 | 0.00707  | 0.00180  |
| Q <sub>30</sub> | 758.4                          | -0.00021 | -0.00008 | -0.00008 | -0.00031 | -0.00000 | -0.00017 |
| Q <sub>29</sub> | 788.2                          | 0.00184  | 0.01326  | -0.02271 | 0.00441  | 0.01527  | -0.00036 |
| Q <sub>28</sub> | 812.4                          | 0.00000  | -0.00002 | 0.00014  | -0.00001 | -0.00002 | -0.00001 |
| Q <sub>27</sub> | 853.3                          | 0.00021  | 0.00003  | 0.00013  | -0.00016 | 0.00019  | 0.00025  |
| Q <sub>26</sub> | 896.8                          | 0.00015  | -0.00025 | -0.00005 | 0.00001  | -0.00038 | -0.00005 |
| Q <sub>25</sub> | 900.7                          | 0.00849  | -0.00040 | -0.02093 | 0.00915  | 0.01999  | 0.01097  |
| Q <sub>24</sub> | 934.2                          | 0.00015  | -0.00042 | 0.00007  | -0.00010 | -0.00034 | 0.00010  |
| Q <sub>23</sub> | 946.4                          | -0.00019 | 0.04540  | -0.02094 | 0.03089  | 0.05405  | -0.00555 |
| Q <sub>22</sub> | 1087.9                         | 0.00338  | -0.07131 | 0.08651  | 0.00308  | 0.00983  | 0.03931  |
| Q <sub>21</sub> | 1110.3                         | -0.03067 | -0.08121 | -0.05557 | 0.02553  | -0.07290 | 0.01107  |
| Q <sub>20</sub> | 1148.0                         | -0.09902 | -0.06971 | -0.01913 | 0.04360  | 0.02634  | -0.00259 |
| Q <sub>19</sub> | 1159.6                         | 0.10652  | 0.03081  | -0.14531 | -0.02677 | -0.00863 | 0.02887  |
| Q <sub>18</sub> | 1238.7                         | -0.19717 | -0.34393 | -0.03553 | 0.07184  | -0.08873 | -0.00978 |
| Q <sub>17</sub> | 1269.9                         | 0.20249  | 0.02477  | -0.02858 | -0.08719 | 0.01016  | 0.06142  |
| Q <sub>16</sub> | 1303.8                         | -0.29221 | -0.10954 | -0.26357 | 0.01935  | 0.00273  | 0.02439  |
| Q <sub>15</sub> | 1353.2                         | -0.80495 | -0.03122 | 0.08359  | -0.30333 | 0.16715  | 0.02970  |
| Q <sub>14</sub> | 1390.2                         | -0.19630 | 0.49705  | -0.48005 | -0.27250 | -0.01941 | -0.11161 |
| Q <sub>13</sub> | 1457.3                         | 0.10962  | 0.47750  | 0.11224  | -0.38808 | -0.48200 | -0.09114 |
| Q <sub>12</sub> | 1487.0                         | 0.21476  | -0.22327 | -0.74945 | -0.12823 | 0.13604  | 0.15840  |
| Q <sub>11</sub> | 1499.8                         | 0.15014  | -0.47700 | 0.14085  | -0.72938 | -0.20019 | 0.19549  |
| Q <sub>10</sub> | 1546.3                         | -0.16690 | -0.25566 | -0.18770 | 0.26030  | -0.74742 | -0.32925 |
| Q <sub>9</sub>  | 1611.8                         | -0.13108 | 0.15715  | -0.02568 | 0.22053  | -0.31942 | 0.88903  |
| Q <sub>8</sub>  | 1657.9                         | 0.00286  | -0.05386 | -0.16452 | -0.02062 | -0.03942 | -0.09516 |
| Q <sub>7</sub>  | 2151.4                         | -0.00516 | -0.02241 | 0.00310  | 0.01061  | -0.01732 | 0.00006  |
| Q <sub>6</sub>  | 3205.8                         | 0.00059  | -0.00140 | 0.00416  | -0.00076 | 0.00425  | -0.00505 |
| Q <sub>5</sub>  | 3214.3                         | -0.00437 | 0.00222  | 0.00258  | 0.00253  | -0.00219 | 0.00125  |
| Q <sub>4</sub>  | 3226.8                         | -0.00419 | -0.00159 | -0.00450 | 0.00144  | 0.00501  | -0.00212 |
| Q <sub>3</sub>  | 3267.6                         | 0.00150  | 0.00175  | 0.00072  | 0.00430  | -0.00103 | 0.00033  |
| Q <sub>2</sub>  | 3286.4                         | 0.00334  | -0.00177 | 0.00353  | -0.00414 | 0.00422  | 0.00379  |
| Q <sub>1</sub>  | 3680.4                         | 0.00105  | 0.00211  | -0.00099 | -0.00123 | -0.00063 | -0.00229 |

*Continued on next page*

| Nr.             | S <sub>0</sub> /S <sub>1</sub> | 1617.7   | 1630.2   | 2085.1   | 3218.6   | 3233.1   | 3234.4   |
|-----------------|--------------------------------|----------|----------|----------|----------|----------|----------|
| Q <sub>45</sub> | 105.2                          | 0.00004  | -0.00005 | -0.00036 | -0.00001 | 0.00001  | -0.00000 |
| Q <sub>44</sub> | 139.2                          | 0.00244  | -0.00005 | -0.00215 | -0.00009 | -0.00000 | 0.00034  |
| Q <sub>43</sub> | 225.7                          | -0.00013 | 0.00004  | 0.00012  | 0.00000  | 0.00002  | 0.00003  |
| Q <sub>42</sub> | 263.9                          | -0.00016 | -0.00017 | -0.00055 | -0.00001 | 0.00002  | 0.00002  |
| Q <sub>41</sub> | 379.1                          | 0.00296  | 0.00149  | -0.00072 | 0.00045  | -0.00030 | -0.00017 |
| Q <sub>40</sub> | 400.2                          | 0.00004  | 0.00023  | 0.00006  | 0.00003  | -0.00007 | 0.00002  |
| Q <sub>39</sub> | 417.1                          | -0.01196 | 0.00348  | 0.00581  | -0.00009 | -0.00078 | -0.00058 |
| Q <sub>38</sub> | 421.3                          | -0.00057 | -0.00011 | 0.00025  | 0.00000  | -0.00004 | 0.00000  |
| Q <sub>37</sub> | 481.7                          | 0.00022  | 0.00012  | 0.00090  | -0.00001 | 0.00003  | -0.00001 |
| Q <sub>36</sub> | 532.2                          | -0.04971 | -0.01070 | -0.00660 | 0.00117  | 0.00074  | -0.00067 |
| Q <sub>35</sub> | 606.1                          | 0.00008  | 0.00011  | 0.00020  | 0.00001  | 0.00000  | 0.00003  |
| Q <sub>34</sub> | 613.8                          | -0.01042 | -0.00165 | -0.00150 | 0.00082  | 0.00105  | 0.00027  |
| Q <sub>33</sub> | 633.2                          | 0.00045  | 0.00031  | -0.00042 | 0.00001  | -0.00005 | -0.00001 |
| Q <sub>32</sub> | 722.0                          | 0.00005  | -0.00019 | -0.00000 | 0.00000  | 0.00001  | 0.00001  |
| Q <sub>31</sub> | 729.2                          | 0.00290  | 0.00594  | 0.00586  | -0.00070 | -0.00068 | -0.00270 |
| Q <sub>30</sub> | 758.4                          | -0.00003 | -0.00025 | -0.00002 | -0.00002 | 0.00001  | 0.00003  |
| Q <sub>29</sub> | 788.2                          | 0.02807  | 0.00215  | 0.00369  | 0.00141  | -0.00031 | -0.00023 |
| Q <sub>28</sub> | 812.4                          | -0.00003 | -0.00016 | 0.00010  | 0.00008  | -0.00014 | -0.00014 |
| Q <sub>27</sub> | 853.3                          | -0.00004 | -0.00001 | -0.00001 | 0.00001  | 0.00001  | -0.00006 |
| Q <sub>26</sub> | 896.8                          | 0.00018  | -0.00002 | -0.00009 | 0.00003  | 0.00010  | -0.00019 |
| Q <sub>25</sub> | 900.7                          | -0.04896 | -0.01009 | 0.00161  | 0.00016  | -0.00043 | 0.00006  |
| Q <sub>24</sub> | 934.2                          | -0.00034 | 0.00009  | 0.00010  | -0.00017 | -0.00001 | -0.00001 |
| Q <sub>23</sub> | 946.4                          | -0.02899 | -0.04542 | 0.00664  | 0.00154  | -0.00044 | 0.00039  |
| Q <sub>22</sub> | 1087.9                         | 0.00512  | 0.00043  | -0.00649 | -0.00076 | -0.00047 | 0.00016  |
| Q <sub>21</sub> | 1110.3                         | 0.02951  | 0.01082  | -0.00982 | 0.00175  | 0.00211  | 0.00135  |
| Q <sub>20</sub> | 1148.0                         | -0.02879 | 0.03341  | -0.01007 | 0.00045  | -0.00210 | 0.00211  |
| Q <sub>19</sub> | 1159.6                         | 0.02458  | 0.04190  | 0.00240  | 0.00585  | 0.00284  | 0.00149  |
| Q <sub>18</sub> | 1238.7                         | 0.06876  | 0.01016  | -0.00481 | 0.00250  | 0.00377  | 0.00112  |
| Q <sub>17</sub> | 1269.9                         | 0.00147  | -0.02065 | -0.00172 | -0.00160 | 0.00273  | 0.00302  |
| Q <sub>16</sub> | 1303.8                         | -0.14249 | -0.05545 | -0.00037 | -0.00171 | 0.00147  | 0.00063  |
| Q <sub>15</sub> | 1353.2                         | -0.24695 | -0.07652 | 0.00818  | -0.00266 | -0.00282 | -0.00510 |
| Q <sub>14</sub> | 1390.2                         | 0.59427  | 0.10617  | -0.01987 | 0.00480  | 0.00137  | -0.00218 |
| Q <sub>13</sub> | 1457.3                         | -0.50864 | -0.13396 | -0.01097 | 0.00029  | 0.00148  | 0.00431  |
| Q <sub>12</sub> | 1487.0                         | -0.35438 | -0.25415 | 0.00734  | -0.00189 | -0.00954 | -0.00046 |
| Q <sub>11</sub> | 1499.8                         | 0.27019  | 0.07704  | 0.00687  | 0.00186  | 0.00123  | 0.00338  |
| Q <sub>10</sub> | 1546.3                         | 0.10033  | -0.09534 | 0.03408  | 0.00194  | -0.00025 | -0.00244 |
| Q <sub>9</sub>  | 1611.8                         | 0.04404  | 0.09617  | 0.00308  | 0.00786  | 0.00212  | -0.00132 |
| Q <sub>8</sub>  | 1657.9                         | -0.28690 | 0.93054  | -0.03065 | 0.00243  | -0.00268 | 0.00038  |
| Q <sub>7</sub>  | 2151.4                         | 0.00322  | -0.03466 | -0.99837 | 0.00157  | -0.00196 | -0.00069 |
| Q <sub>6</sub>  | 3205.8                         | -0.00326 | -0.00404 | 0.00219  | 0.95568  | -0.27809 | -0.09549 |
| Q <sub>5</sub>  | 3214.3                         | 0.00556  | 0.00057  | 0.00071  | -0.13093 | -0.69356 | 0.70825  |
| Q <sub>4</sub>  | 3226.8                         | -0.00390 | -0.00182 | -0.00116 | 0.26318  | 0.66437  | 0.69936  |
| Q <sub>3</sub>  | 3267.6                         | 0.00462  | 0.00294  | 0.00046  | -0.00675 | 0.00280  | 0.00629  |
| Q <sub>2</sub>  | 3286.4                         | 0.00045  | 0.00089  | -0.00124 | 0.00750  | 0.00877  | -0.00423 |
| Q <sub>1</sub>  | 3680.4                         | -0.00369 | -0.00083 | -0.00011 | 0.00033  | 0.00034  | 0.00014  |

*Continued on next page*

| Nr.      | $S_0/S_1$ | 3265.6   | 3285.1   | 3672.3   |
|----------|-----------|----------|----------|----------|
| $Q_{45}$ | 105.2     | -0.00003 | -0.00004 | -0.00004 |
| $Q_{44}$ | 139.2     | 0.00029  | 0.00017  | 0.00014  |
| $Q_{43}$ | 225.7     | -0.00005 | -0.00007 | -0.00014 |
| $Q_{42}$ | 263.9     | 0.00003  | 0.00005  | -0.00002 |
| $Q_{41}$ | 379.1     | 0.00047  | -0.00009 | 0.00059  |
| $Q_{40}$ | 400.2     | 0.00007  | -0.00001 | -0.00082 |
| $Q_{39}$ | 417.1     | 0.00027  | 0.00047  | 0.00001  |
| $Q_{38}$ | 421.3     | 0.00001  | 0.00002  | -0.00012 |
| $Q_{37}$ | 481.7     | -0.00000 | 0.00003  | 0.00008  |
| $Q_{36}$ | 532.2     | 0.00015  | -0.00038 | 0.00008  |
| $Q_{35}$ | 606.1     | 0.00014  | 0.00013  | -0.00023 |
| $Q_{34}$ | 613.8     | -0.00041 | -0.00032 | -0.00017 |
| $Q_{33}$ | 633.2     | 0.00002  | 0.00004  | -0.00006 |
| $Q_{32}$ | 722.0     | 0.00020  | 0.00026  | 0.00002  |
| $Q_{31}$ | 729.2     | -0.00027 | 0.00023  | -0.00031 |
| $Q_{30}$ | 758.4     | -0.00028 | -0.00034 | -0.00011 |
| $Q_{29}$ | 788.2     | -0.00027 | -0.00048 | 0.00041  |
| $Q_{28}$ | 812.4     | 0.00002  | 0.00005  | -0.00001 |
| $Q_{27}$ | 853.3     | -0.00023 | -0.00059 | 0.00004  |
| $Q_{26}$ | 896.8     | 0.00004  | 0.00002  | 0.00002  |
| $Q_{25}$ | 900.7     | -0.00042 | 0.00039  | 0.00151  |
| $Q_{24}$ | 934.2     | 0.00001  | 0.00004  | 0.00003  |
| $Q_{23}$ | 946.4     | -0.00080 | -0.00020 | -0.00031 |
| $Q_{22}$ | 1087.9    | -0.00201 | -0.00008 | 0.00087  |
| $Q_{21}$ | 1110.3    | -0.00192 | -0.00388 | 0.00158  |
| $Q_{20}$ | 1148.0    | 0.00020  | -0.00155 | 0.00209  |
| $Q_{19}$ | 1159.6    | 0.00021  | 0.00162  | 0.00007  |
| $Q_{18}$ | 1238.7    | 0.00090  | -0.00198 | 0.00286  |
| $Q_{17}$ | 1269.9    | 0.00257  | 0.00068  | 0.00102  |
| $Q_{16}$ | 1303.8    | 0.00135  | -0.00052 | 0.00057  |
| $Q_{15}$ | 1353.2    | 0.00478  | 0.00117  | -0.00079 |
| $Q_{14}$ | 1390.2    | -0.00144 | -0.00313 | 0.00065  |
| $Q_{13}$ | 1457.3    | 0.00271  | -0.00086 | -0.00330 |
| $Q_{12}$ | 1487.0    | 0.00352  | 0.00070  | -0.00228 |
| $Q_{11}$ | 1499.8    | -0.00010 | 0.00566  | 0.00124  |
| $Q_{10}$ | 1546.3    | 0.00145  | -0.00560 | -0.00083 |
| $Q_9$    | 1611.8    | -0.00201 | -0.00010 | 0.00196  |
| $Q_8$    | 1657.9    | -0.00092 | -0.00050 | -0.00081 |
| $Q_7$    | 2151.4    | 0.00021  | 0.00135  | -0.00016 |
| $Q_6$    | 3205.8    | 0.00581  | 0.00739  | -0.00022 |
| $Q_5$    | 3214.3    | -0.00004 | -0.01065 | 0.00019  |
| $Q_4$    | 3226.8    | -0.00575 | 0.00317  | -0.00044 |
| $Q_3$    | 3267.6    | 0.94773  | 0.31879  | -0.00018 |
| $Q_2$    | 3286.4    | 0.31885  | -0.94767 | -0.00195 |
| $Q_1$    | 3680.4    | 0.00081  | -0.00178 | 0.99998  |

Table S3: Experimental intensities of the assigned bands in the DF and LIF spectra relative to the strongest band in each spectrum. Keep in mind, that the mode numbering is different in the  $S_0$  and the  $S_1$  state as can be inferred from Table 1 of the main text. No 0,0 intensities for the fluorescence emission spectra is given since they might be contaminated by laser stray light and have not been used in the FC fit.

| Mode              | Emission |       |      |      | Abs. |
|-------------------|----------|-------|------|------|------|
|                   | Origin   | +350  | +666 | +753 |      |
| 0,0               |          |       |      |      | 0.80 |
| $Q_{45}^2$        | 0.05     | 0.001 |      | 0.01 |      |
| $Q_{44}$          | 0.15     | 0.004 | 0.06 | 0.02 |      |
| $Q_{43}^2$        | 0.03     |       |      |      |      |
| $Q_{41}$          | 0.02     | 1.000 |      |      |      |
| $Q_{41}^2$        |          |       | 0.07 |      |      |
| $Q_{41} + Q_{36}$ |          | 0.14  |      |      |      |
| $Q_{41} + Q_{34}$ |          |       |      |      | 0.49 |
| $Q_{41} + Q_{31}$ |          | 0.15  |      |      |      |
| $Q_{41} + Q_{29}$ |          | 0.24  |      |      |      |
| $Q_{41} + Q_{23}$ |          | 0.06  |      |      |      |
| $Q_{41} + Q_{22}$ |          | 0.10  |      |      |      |
| $Q_{41} + Q_{18}$ |          | 0.08  |      |      |      |
| $Q_{41} + Q_{17}$ |          | 0.15  |      |      |      |
| $Q_{40}^2$        | 0.12     | 0.010 |      | 0.10 |      |
| $Q_{39}$          | 0.05     | 0.001 |      | 0.05 | 0.68 |
| $Q_{39} + Q_{31}$ |          | 0.03  |      |      |      |
| $Q_{39} + Q_{18}$ |          | 0.04  |      |      |      |
| $Q_{38}^2$        |          |       | 0.20 |      |      |
| $Q_{37}^2$        | 0.08     |       |      | 0.02 | 0.32 |
| $Q_{36}$          | 0.63     |       |      | 0.15 | 0.36 |
| $Q_{32}^2$        | 0.40     |       |      | 0.10 |      |
| $Q_{31}$          | 0.59     | 0.050 | 1.0  | 0.08 | 0.06 |
| $Q_{30}^2$        |          | 0.020 |      | 0.15 | 0.17 |
| $Q_{29}$          | 1.00     | 0.030 |      | 1.00 | 0.64 |
| $Q_{28}^2$        | 0.08     | 0.040 |      |      |      |
| $Q_{26}$          |          |       |      |      | 1.00 |
| $Q_{25}$          | 0.10     |       |      |      |      |
| $Q_{23}$          |          |       |      |      | 1.00 |
| $Q_{22}$          | 0.42     | 0.010 | 0.05 | 0.09 | 0.02 |
| $Q_{20}$          |          |       |      |      | 0.11 |
| $Q_{18}$          | 0.38     |       |      | 0.03 | 0.14 |
| $Q_{17}$          | 0.62     | 0.030 | 0.07 |      |      |
| $Q_{16}$          | 0.23     |       |      | 0.12 | 0.79 |
| $Q_{15}$          | 0.06     |       |      |      | 0.06 |
| $Q_{13}$          | 0.27     |       |      |      |      |
| $Q_{11}$          |          | 0.020 |      | 0.15 | 0.17 |
| $Q_{10}$          | 0.21     |       |      |      |      |
| $Q_8$             | 0.05     | 0.150 |      |      |      |
| $Q_7$             | 0.06     |       |      | 0.06 |      |
